# Supplementary material for: The role of microbiomes in cooperative detoxification mechanisms of arsenate reduction and arsenic methylation in surface agricultural soil
Source: PeerJ journal article supplement (doi:10.7717/peerj.18383), 2024-10-30
Supplement: Figure_S1.pdf [file Figure_S1.pdf]

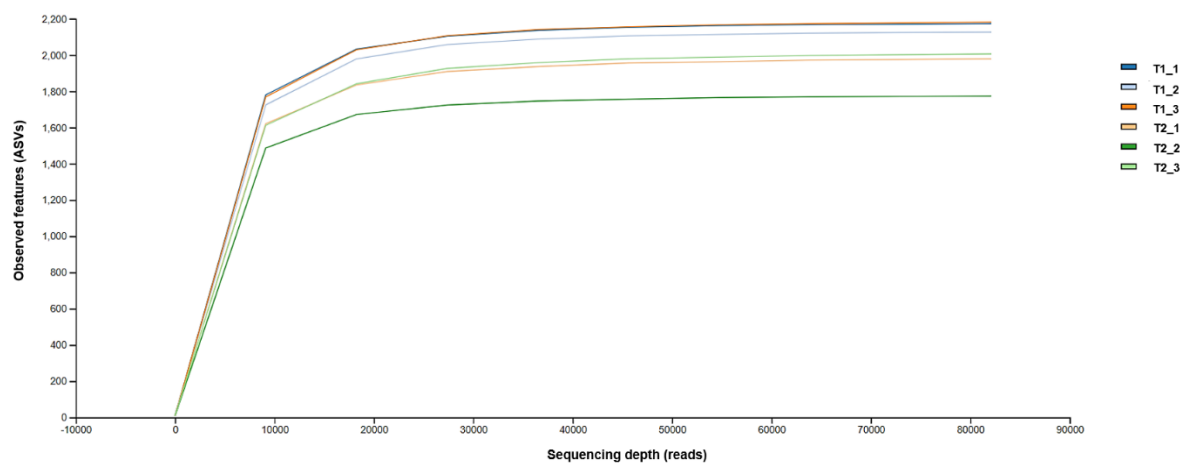

**Figure S1.** Rarefaction curves of soil samples collected from the dry (T1) and wet (T2) seasons with three replications for each season (T1\_1, T1\_2, T1\_3 and T2\_1, T2\_2, T2\_3).
