# Supplementary material for: The role of microbiomes in cooperative detoxification mechanisms of arsenate reduction and arsenic methylation in surface agricultural soil
Source: PeerJ journal article supplement (doi:10.7717/peerj.18383), 2024-10-30
Supplement: Figure_S2.pdf [file Figure_S2.pdf]

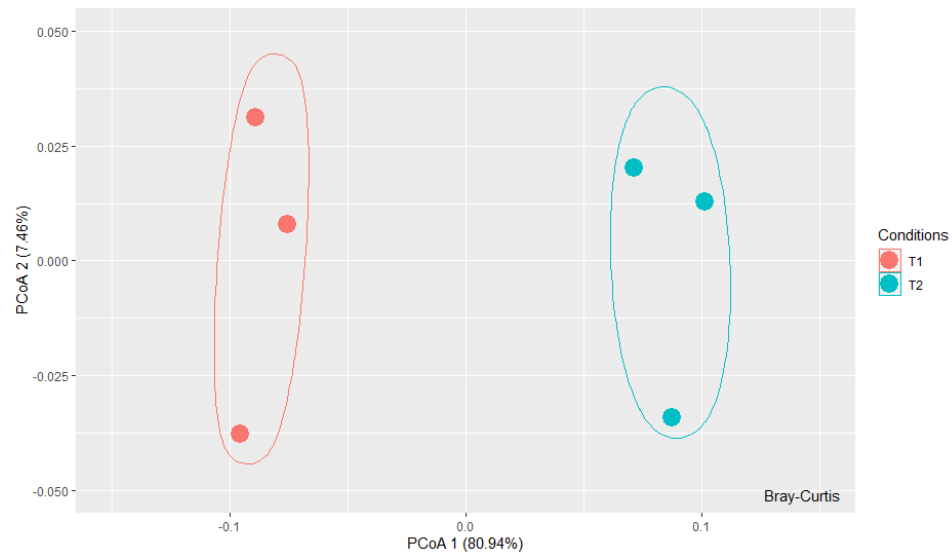

**Figure S2.** Principal coordinate analysis (PCoA) based on Bray-Curtis distance matrix of soil samples collected from the dry (T1) and wet (T2) seasons with three replications for each season.
