# Supplementary material for: The role of microbiomes in cooperative detoxification mechanisms of arsenate reduction and arsenic methylation in surface agricultural soil
Source: PeerJ journal article supplement (doi:10.7717/peerj.18383), 2024-10-30
Supplement: Figure_S3.pdf [file Figure_S3.pdf]

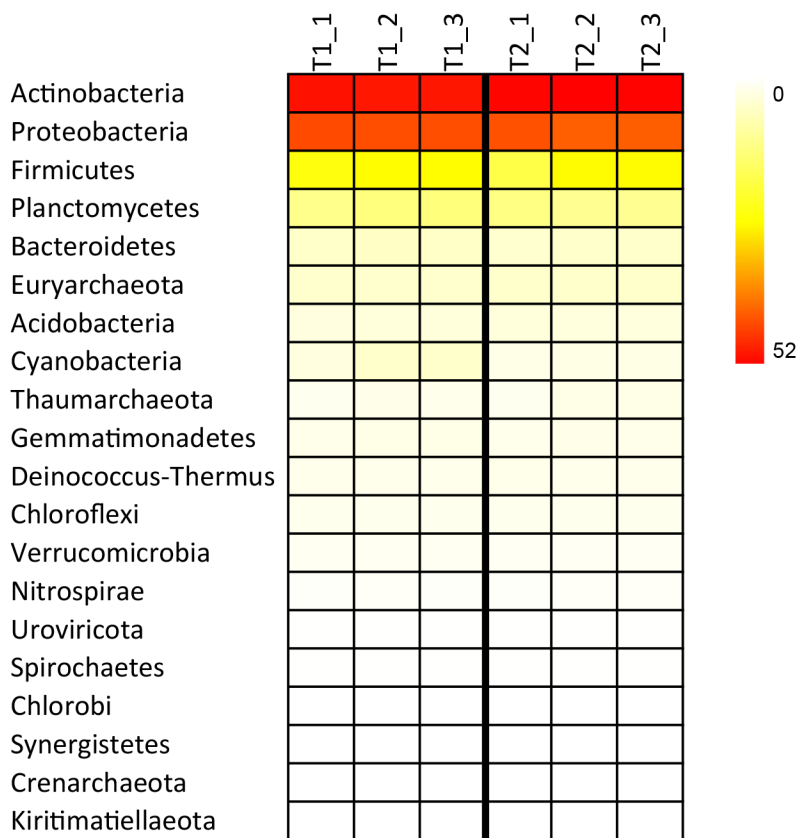

**Figure S3.** Relative abundance obtained from metagenomic analysis at the phylum level of both the dry season (T1\_1, T1\_2, and T1\_3) and wet season (T2\_1, T2\_2, and T2\_3).
